# Supplementary material for: Multisignaling detection of Hg2+ based on a phosphorescent iridium(iii) complex
Source: Royal Society of Chemistry journal article supplement (doi:10.1039/b804858d), 2008-01-01
Supplement: b804858d.pdf [file b804858d.pdf]

# Supporting Information

## Multisignaling Detection of Hg<sup>2+</sup> Based on a Phosphorescent Iridium(III) Complex

Qiang Zhao,<sup>†</sup> ShuJuan Liu<sup>‡</sup> Fuyou Li,<sup>\*,†</sup> Tao Yi,<sup>†</sup> Chunhui Huang<sup>\*,†</sup>

<sup>†</sup>Department of Chemistry & Laboratory of Advanced Materials, Fudan University, Shanghai, 200433,  
P. R. China,

<sup>‡</sup>Institute of Advanced Materials (IAM), Nanjing University of Posts and Telecommunications, Nanjing  
210003, P. R. China

\*To whom correspondence should be addressed at: Fax: 86-21-55664621; Tel: 86-21-55664185. E-mail:  
fyli@fudan.edu.cn (F. Y. L); chhuang@pku.edu.cn (C. H. H).

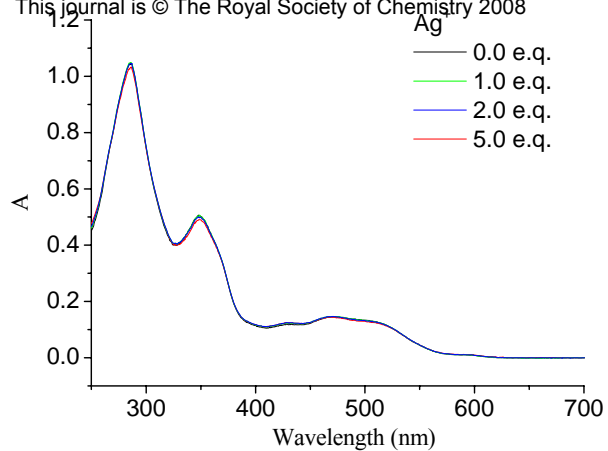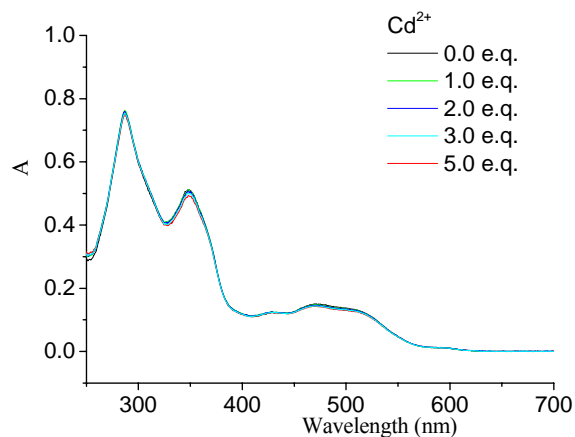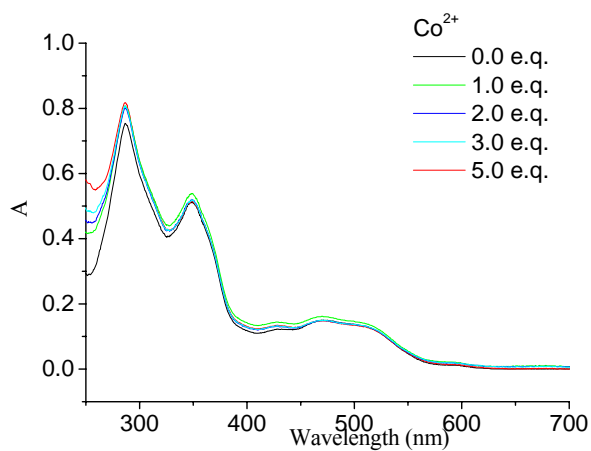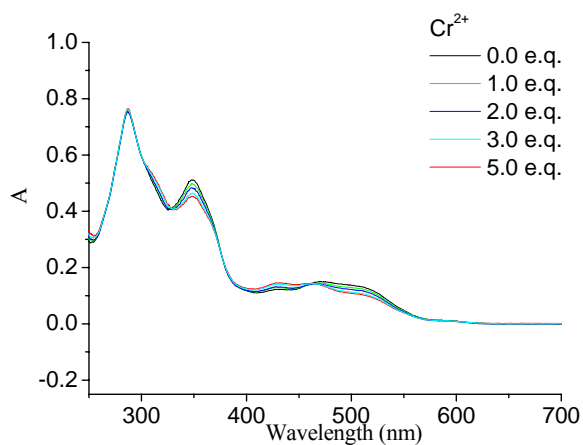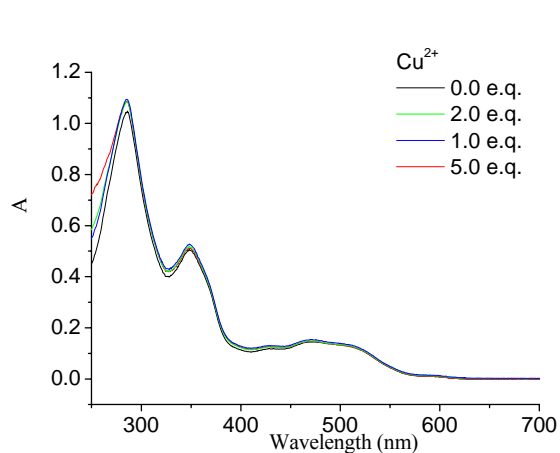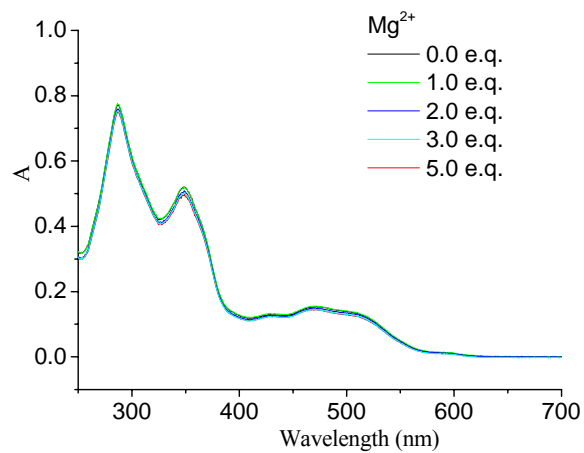

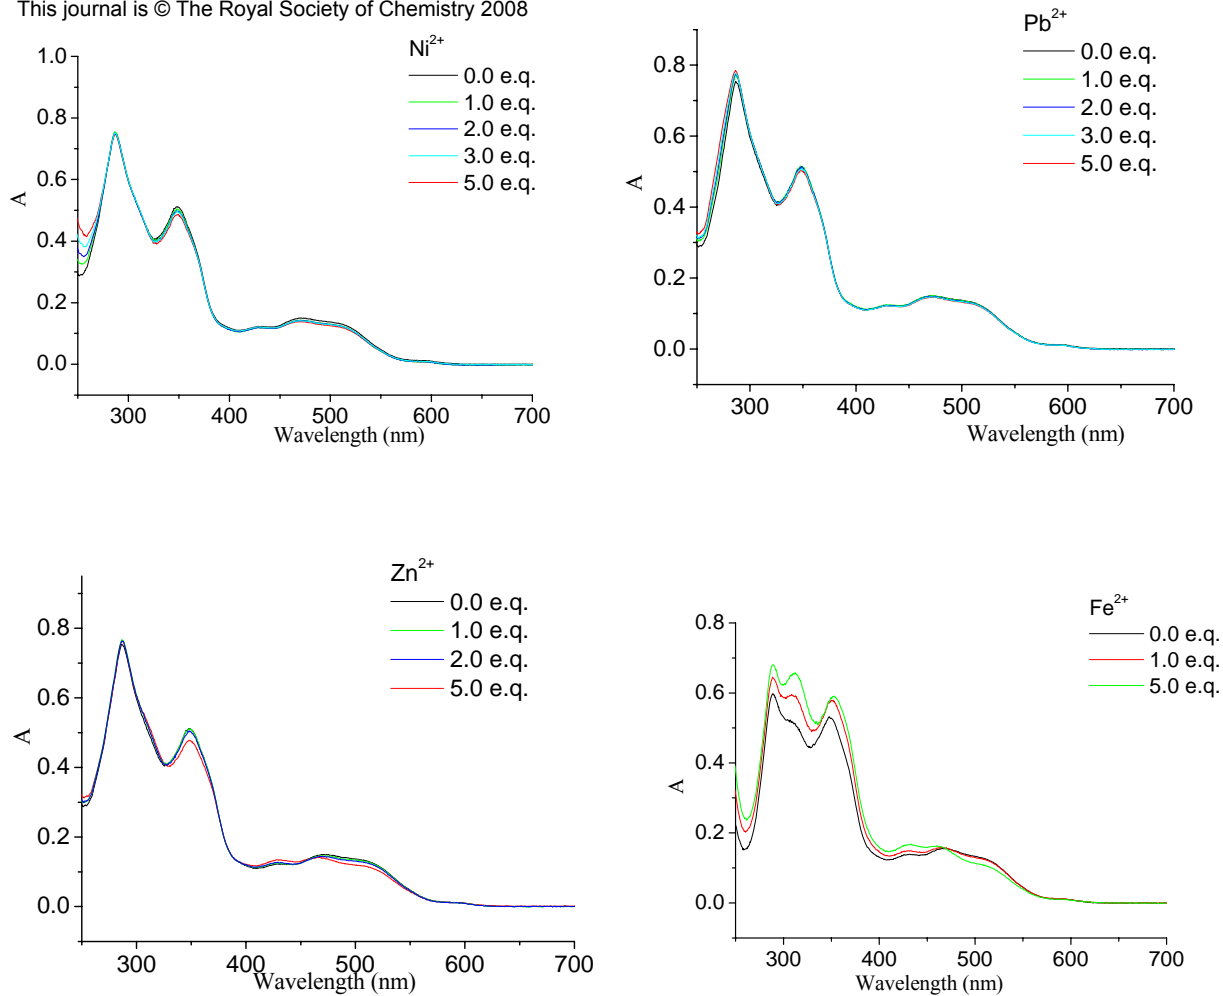

Figure S1. Response of UV-Vis absorption spectra of Ir(thq)<sub>2</sub>(acac) (20 μM) in CH<sub>3</sub>CN solution to various amounts of metal ions.

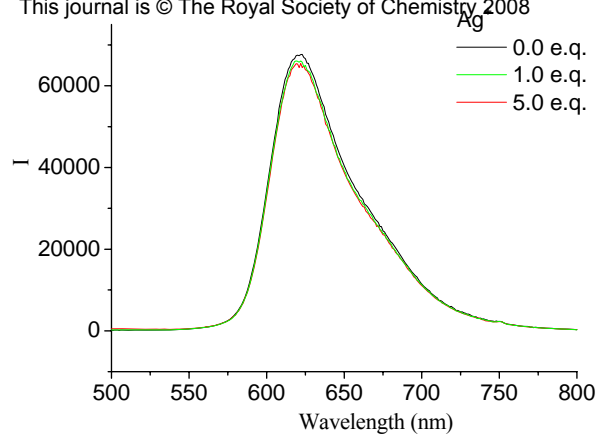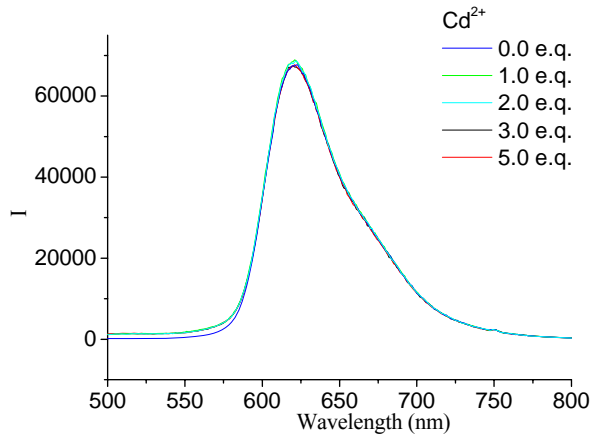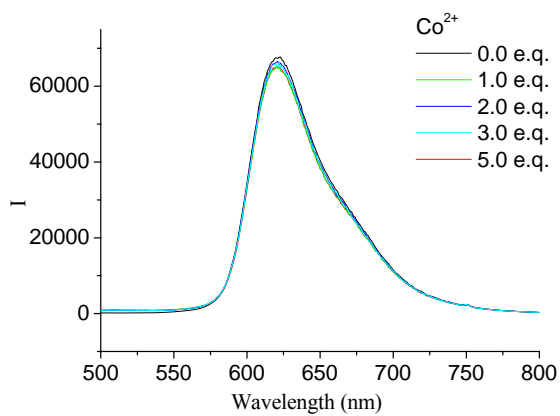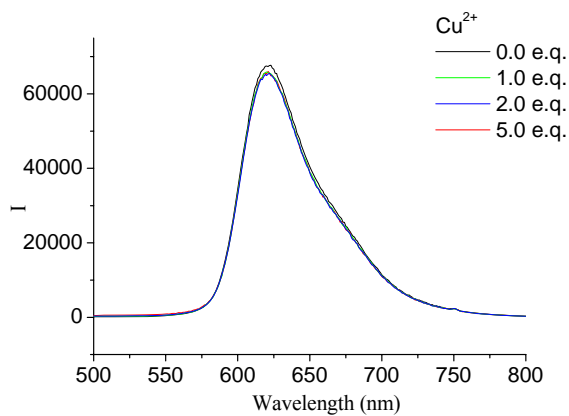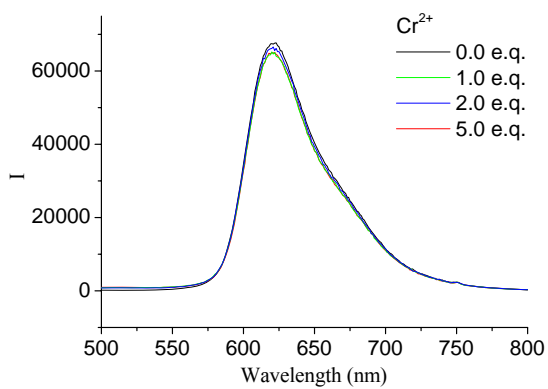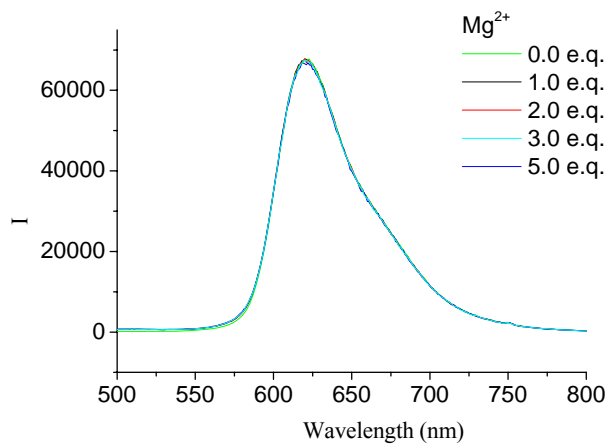

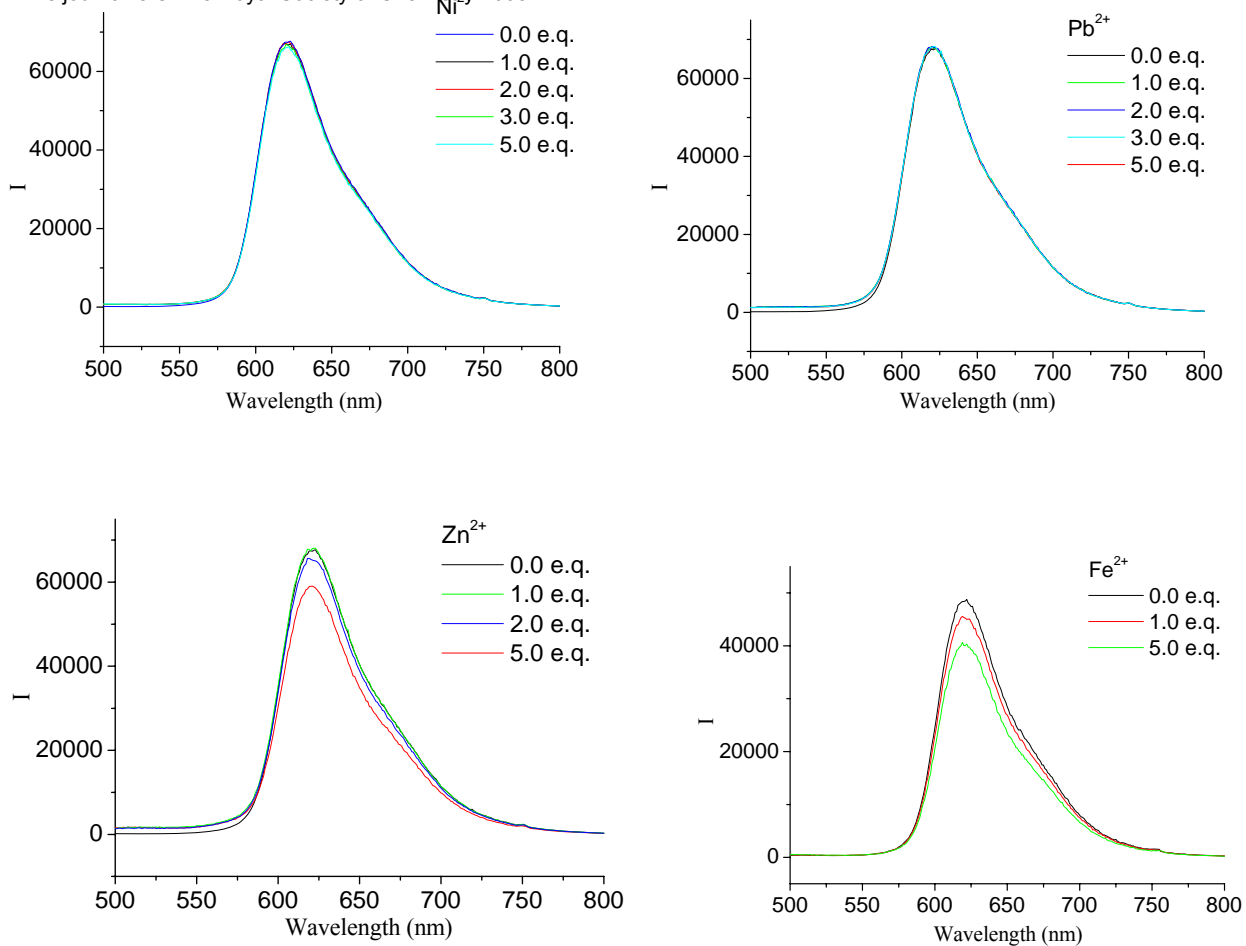

Figure S2. Response of fluorescence spectra of Ir(thq)<sub>2</sub>(acac) (20 μM) in CH<sub>3</sub>CN solution to various amounts of metal ions.  $\lambda_{\text{ex}} = 375\text{nm}$ .

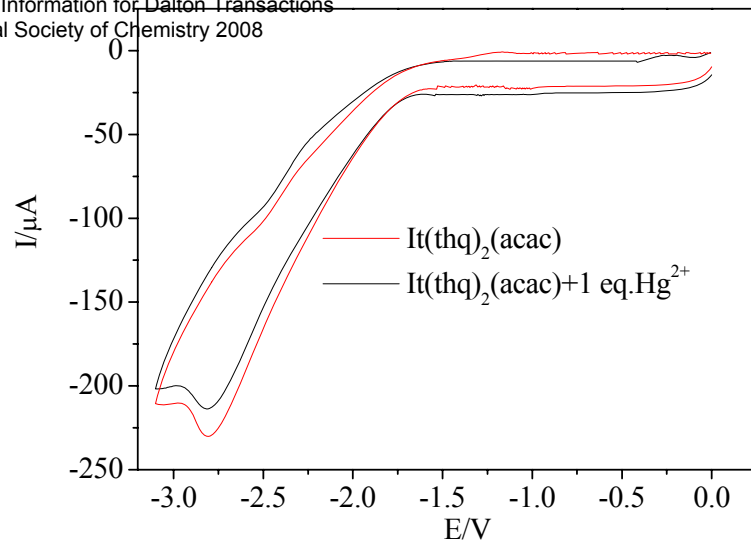

Figure S3. Reduction potentials of Ir(thq)<sub>2</sub>(acac) before and after addition of 1 eq. Hg<sup>2+</sup>.

HOMO

LUMO

$\text{Ir}(\text{btp})_2(\text{acac})\text{-Hg}^{2+}$

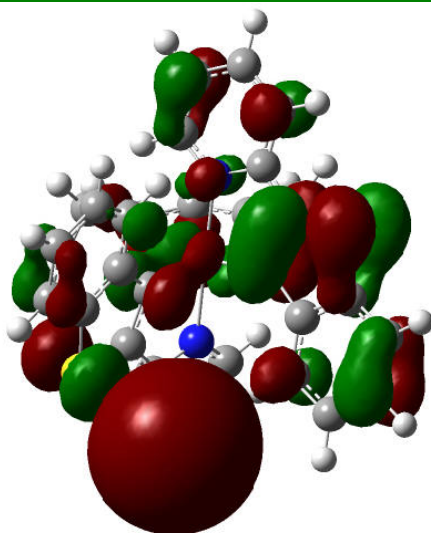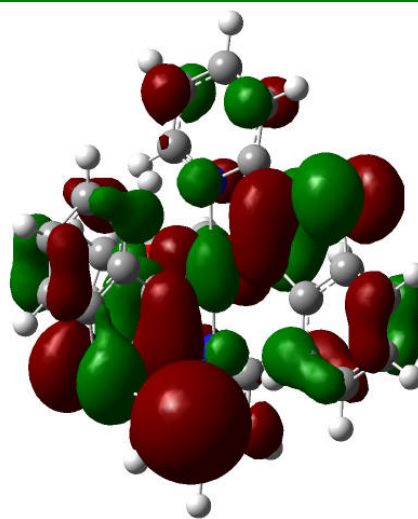

$\text{Ir}(\text{thq})_2(\text{acac})\text{-Hg}^{2+}$

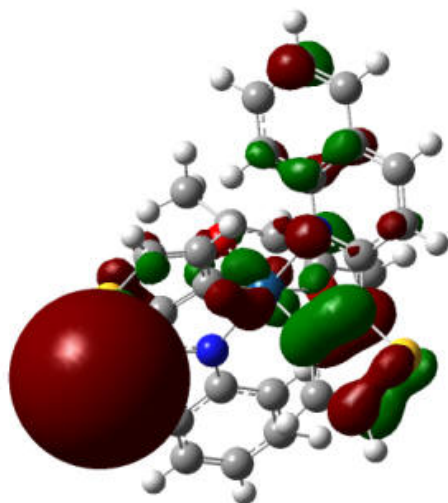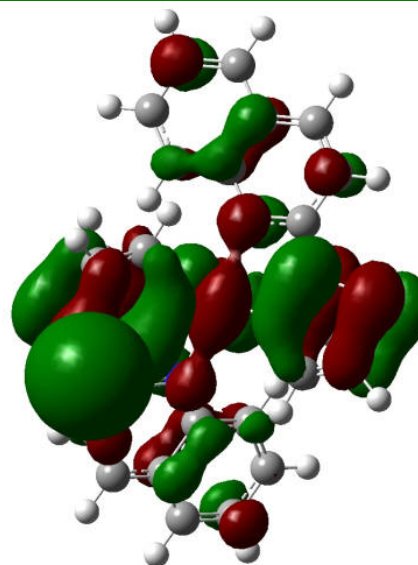

Electronic Supplementary Information for Dalton Transactions.  
Table S2. Calculated charges on Hg and S atoms.  
This journal is © The Royal Society of Chemistry 2008

|    | Ir(btp) <sub>2</sub> (acac) | Ir(thq) <sub>2</sub> (acac) | Ir(btp) <sub>2</sub> (acac)-Hg <sup>2+</sup> | Ir(thq) <sub>2</sub> (acac)-Hg <sup>2+</sup> |
|----|-----------------------------|-----------------------------|----------------------------------------------|----------------------------------------------|
| S  | 0.3953                      | 0.4122                      | 0.6080                                       | 0.5634                                       |
|    | 0.3947                      | 0.4165                      | 0.5940                                       | 0.5736                                       |
| Hg |                             |                             | 0.1587                                       | 0.2079                                       |
